# Supplementary material
Source: MDPI journal article supplement (https://www.mdpi.com/2673-7426/3/4/53)
Supplement: s1 [file s1]

Archive with 4 entries (4 files):
- SupplementaryData/Figure S1.pdf
- SupplementaryData/Table S1.docx
- SupplementaryData/Table S2.docx
- SupplementaryData/Table S3.docx
