# Supplementary material
Source: MDPI journal article supplement (https://www.mdpi.com/2673-7426/3/4/53)
Supplement: s1 [file s1 › SupplementaryData/Figure S1.pdf]

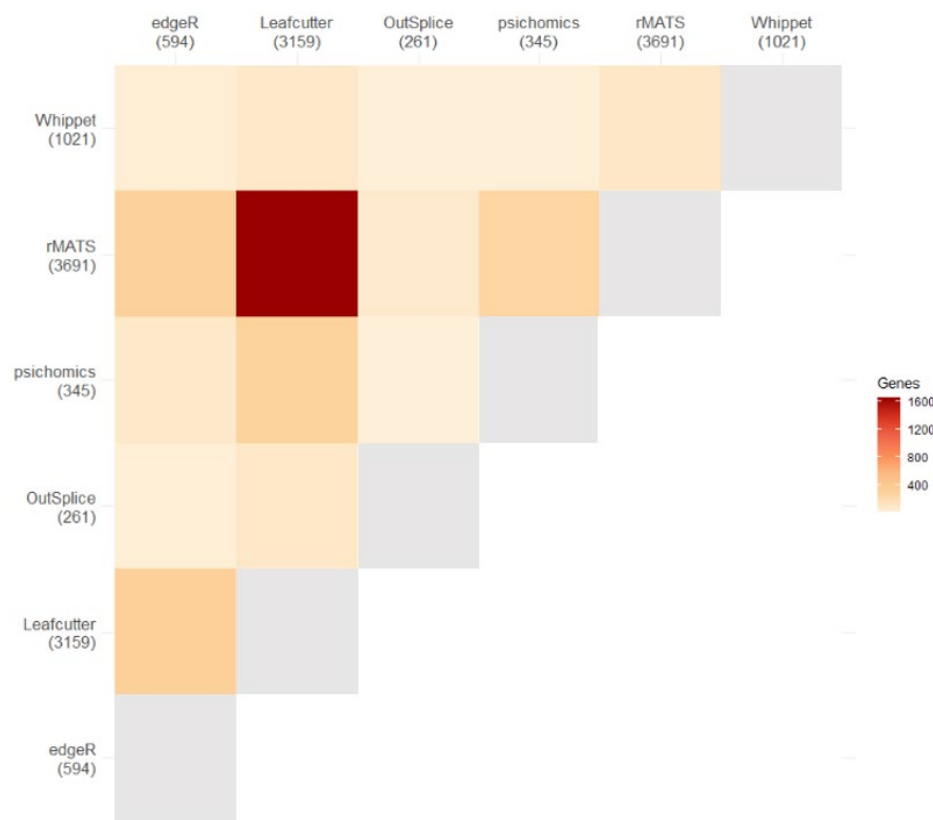

**Figure S1.** Number of overlapping genes with significant splicing differences between tumor and normal tissue across each algorithm. The number indicates the total number of genes containing significant splicing alterations found by that algorithm.
